# Supplementary material
Source: PubMed Central journal article supplement (PMC4778401)
Supplement: NIHMS316662-supplement-S1.pdf [file NIHMS316662-supplement-S1.pdf]

Protein sequence alignment between *Aplysia* AChBP and chick  $\alpha 4$  and  $\beta 2$  nAChR subunits

```

alpha-4      MGFLVSKGNLLLLLCCASIFPAFGHVETRAHAEERLLKKLFS--GYNKWSR 48
beta-2      MALLR-----VLCLLAALRRSL-----CTDTEERLVEYLLDPTRYNKLIR 40
AChBP      -----HSQANLMRLKSDLFN----RSPMY 20
              ** . *:. . .

alpha-4      PVANISDVVLVRFGLSIAQLIDVDEKNQMMTTNVVVKQEWHDYKLRWDPQ 98
beta-2      PATNGSQLVTVQLMVSLAQLISVHEREQIMTTNVWLTQEWEDYRLTWKPE 90
AChBP      PGPTKDDPLTVTLGFTLQDIVKADSSTNEVDLVYEQQRWKLNSLMWDPN 70
              * . . .: : * : .: : : . . . : : : : * . * * * :

alpha-4      EYENVTSIRIPSELIWRPDIIVLYNNADGDFAVTHLTKAHLFYDGRKIKWP 148
beta-2      DFDNMKKVRLPSKHIWLPDVVLYNNADGMYEVSFYSNAVISYDGSIFWLP 140
AChBP      EYGNITDFRTSAADIWTPDITAYSSTR-PVQVLSPQIAVVTHDGSVMFIP 119
              : : * : . . * . : : ** * : . * . : : * * : : * * : : : *

alpha-4      PAIYKSSCSIDVTFPPFDQQNCKMKFGSWTYDKAKIDLVSMSHSHVDQLDY 198
beta-2      PAIYKSACKIEVKHFPPFDQQNCTMKFRSWTYDRTEIDLVLKSEVASLDDF 190
AChBP      AQRLSFMCDPGTGVDS-EEGATCAVKFGSWVYSGFEIDLKTDTDQVDLSSY 168
              . . . * . : . * : * * * * . * : * * * . . . . :

alpha-4      WESGEWVIINAVGNYSKKEYECCTEIPDITYSFIIRRLPLFYTINLIIP 248
beta-2      TPSGEWDIVALPGRRENPNDDST---YVDITYDFIIRRKPLFYTINLIIP 237
AChBP      YASSKYEILSATQTRQVQHYSCCPEPYIDVNLVVKFRER----- 207
              * . : : * : : : . . * * : . . : * .

alpha-4      CLLISCLTVLVFYLPSCEGKITLCSVLLSLTVFLLLITEIIPSTSLVI 298
beta-2      CILITSLAILVFLYLPSDCGEKMTLCSVLLLALTVFLLLISKIVPPTSLDV 287
AChBP      -----

alpha-4      PLIGEYLLFTMIFVTLSEIIITVFLNVVHHRSPRTHTMPDWVRRVFLDIVP 348
beta-2      PLVGKYLMTMVLVTFISIVTSVCVFLNVVHHRSPRTHTMPDWVRRVFLDIVP 337
AChBP      -----RAGNGFFRNLFD---- 219
              : : . * : *

alpha-4      RLLFMKRPSTVKDNCKKLIESMHKLTNSPRLWSETDMEPNFTTSSSPSPQ 398
beta-2      ALLFMKQP---QQNCAR-----QLRQR-----Q 359
AChBP      -----

alpha-4      SNEPSPTSSFAHLEEPKPMCKSPSGQYSMLHPEPPQVTCSSPKPSCHP 448
beta-2      TQERAAAATLFLRAGARACACYANPG----- 385
AChBP      -----

alpha-4      LSDTQTTSISKGRSLSVQQMYSFNKTEEGSIRCRSRSIQYCYLQEDSSQT 498
beta-2      -----AAKAEGLNGYRER----- 398
AChBP      -----

alpha-4      NGHSSASPASQRCHLNEEQPQHKPHQCKCKCRKGAAAGTPTQGSKSHSNK 548
beta-2      QGQGPDPAPCGGLEE----- 415
AChBP      -----

alpha-4      GEHLVLMSPALKLAVEGVHYIADHLRAEDADFSVKEDWKYVAMVIDRIFL 598
beta-2      -----AVEGVRFIADHMRSEDDDDQVSEDDWKYVAMVIDRIFL 452
AChBP      -----

alpha-4      WMFIIIVCLLGTVGLFPPWLAGMI----- 622
beta-2      WIFVFCVFGTVGMFLQPLFQNYATNSLLQLGQGTPTSK 491
AChBP      -----

```
